# Supplementary figures and images for: Precision RNAi using synthetic shRNAmir target sites
Source: eLife journal article supplement (doi:10.7554/elife.84792), 2023-03-03

Precision RNAi using synthetic shRNAmir target sites

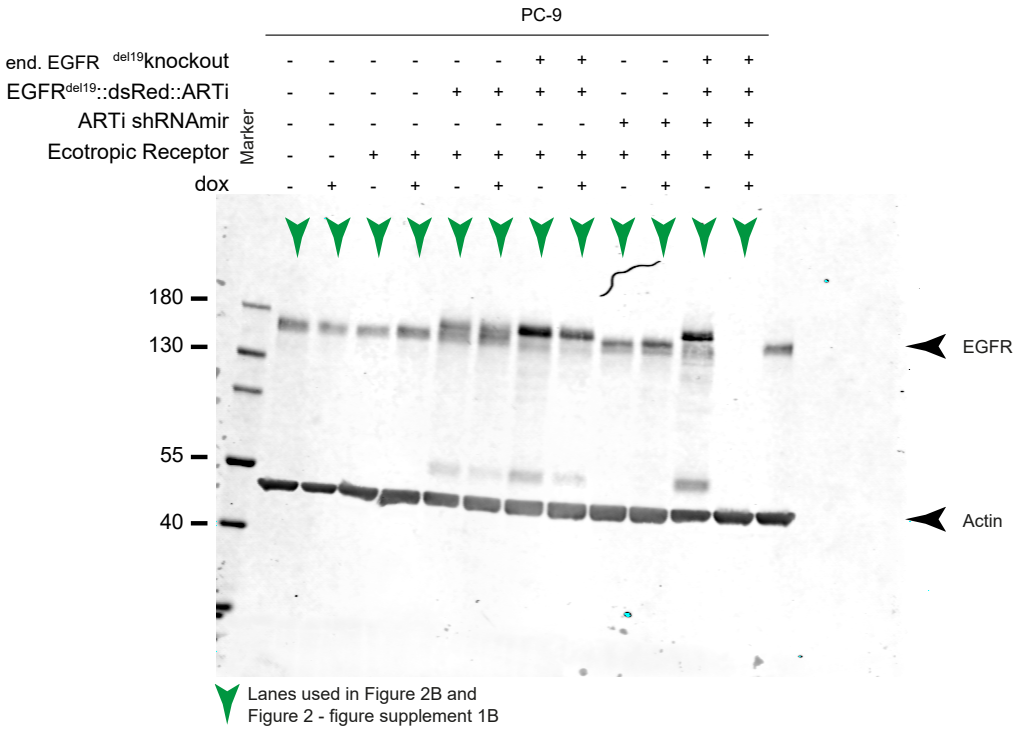

Supplement: fig2-data1 [file elife-84792-fig2-data1-v1.zip]

Precision RNAi using synthetic shRNAmir target sites

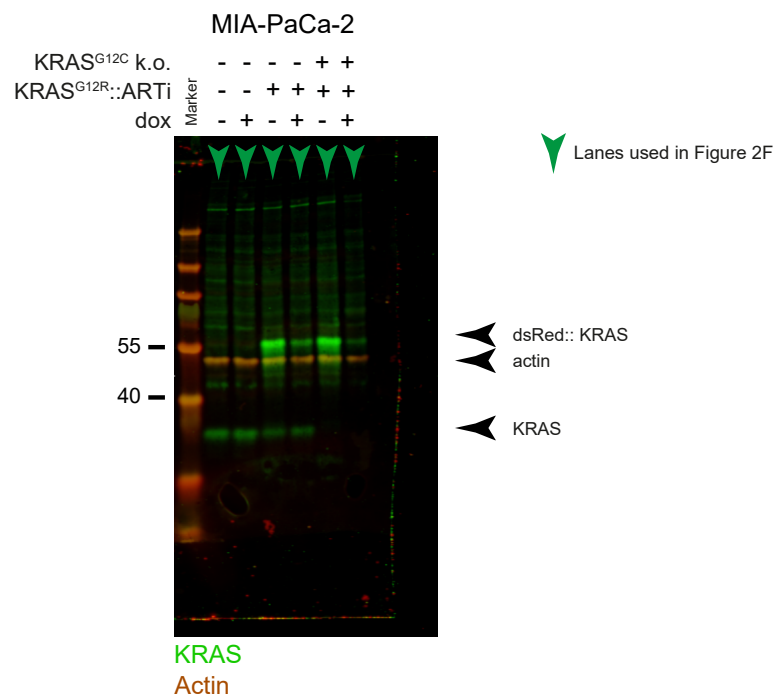

Supplement: fig2-data2 [file elife-84792-fig2-data2-v1.zip]

Precision RNAi using synthetic shRNAmir target sites

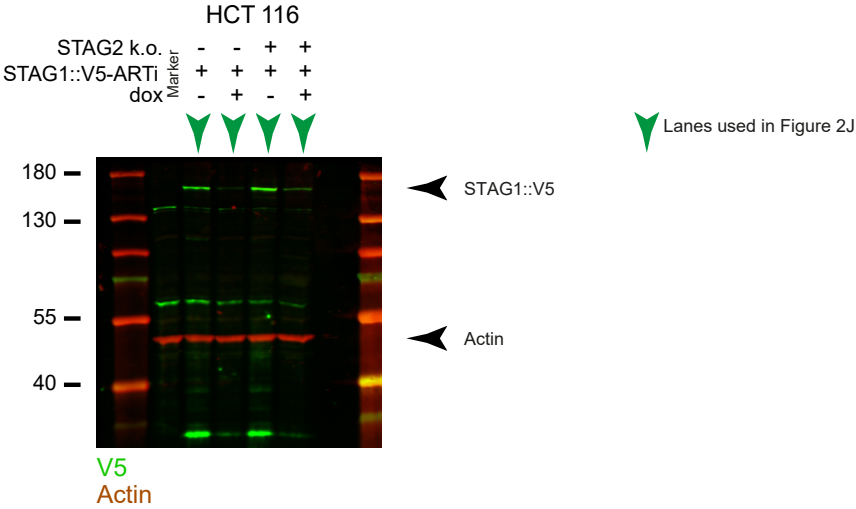

Supplement: fig2-data3 [file elife-84792-fig2-data3-v1.zip]

Precision RNAi using synthetic shRNAmir target sites

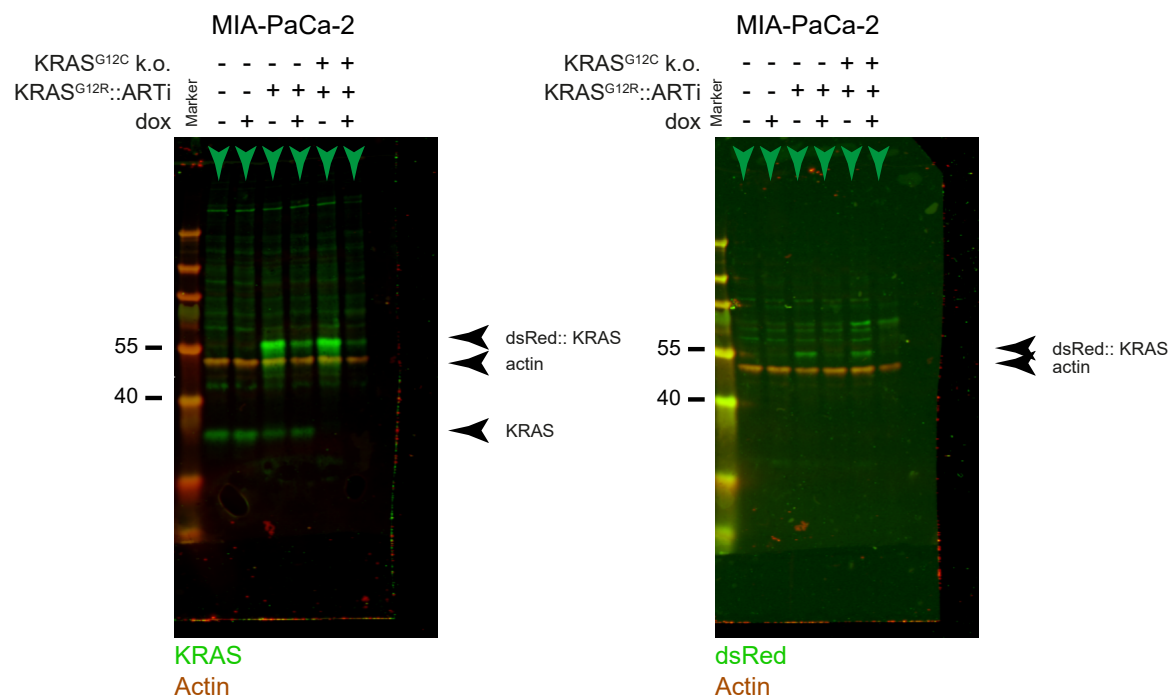

Supplement: fig2-figsupp2-data1 [file elife-84792-fig2-figsupp2-data1-v1.zip]
